# Supplementary material for: Rubber–silica nanocomposites obtained by in situ sol–gel method: particle shape influence on the filler–filler and filler–rubber interactions
Source: Royal Society of Chemistry journal article supplement (doi:10.1039/c1sm06716h), 2012-01-01
Supplement: c1sm06716h.pdf [file c1sm06716h.pdf]

SUPPORTING INFORMATION

**Rubber-silica nanocomposites obtained by *in-situ* sol-gel method: particle shape influence on the filler–filler and filler-rubber interactions.**

**R.Scotti<sup>\*a</sup>, L. Wahba<sup>a,b</sup>, M. Crippa<sup>a</sup>, M. D'Arienzo<sup>a</sup>, R. Donetti<sup>c</sup>, N. Santo<sup>d</sup>, F. Morazzoni<sup>a</sup>.**

*a Dip. Scienze dei Materiali, INSTM, University of Milano-Bicocca, Via 55 R. Cozzi 53, 20125 Milano, Italy. Roberto.Scotti@unimib.it*

*b Corimav Pirelli, Via R. Cozzi 53, 20125 Milano, Italy.*

*c Pirelli Tyre SpA, Viale Sarca, 222, 20126 Milano, Italy.*

*d CIMA Interdepartmental Center of Advanced Microscopy, University of Milano, Via Celoria, 26, 20133Milano, Italy.*

AUTHOR EMAIL ADDRESS Roberto.Scotti@unimib.it

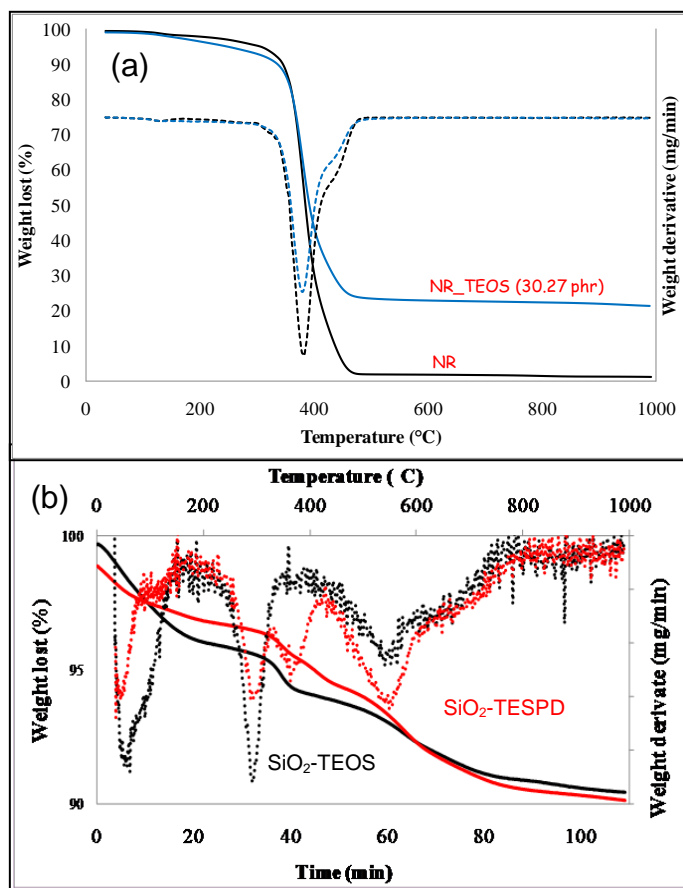

**Figure S1** TGA profiles of (a) NR-TEOS composite in air flow in comparison with NR; (b) SiO<sub>2</sub>-TESPD and SiO<sub>2</sub>-TEOS powders in nitrogen flow.

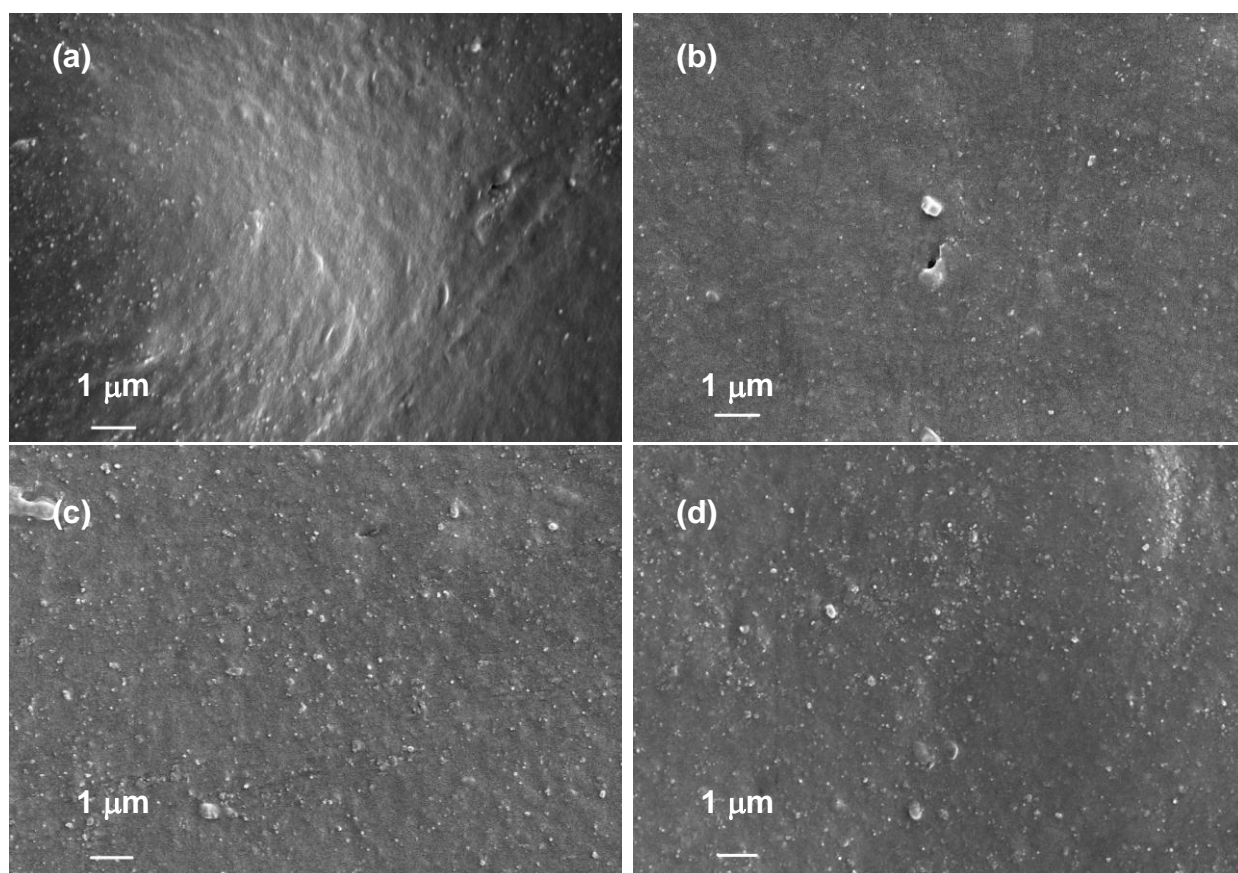

**Figure S2** SEM micrographs of vulcanized composites (a) V-NR-TEOS; (b) V-NR-TMSPM-2; (c) V-NR-TESPD-2; (d) V-NR-TESPT-2.

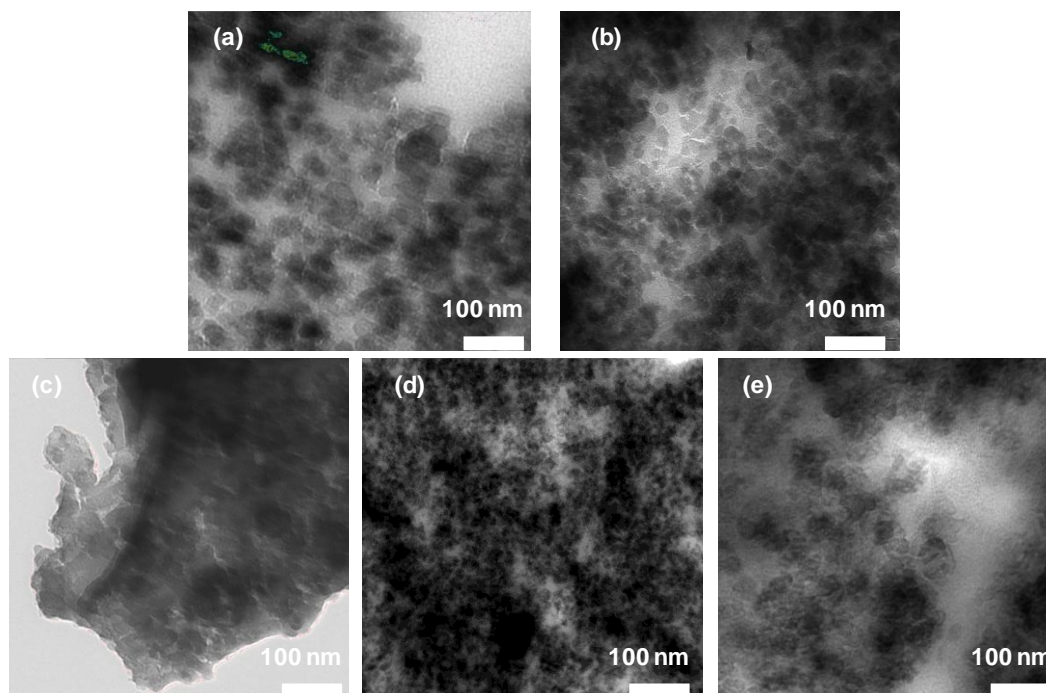

**Figure S3** TEM images of vulcanized a) V-NR-SiO<sub>2</sub>; b) V-NR-TEOS; c) V-NR-TESPD-2; d) V-NR-TESPT-2; e) V-NR-TMSPM-2.

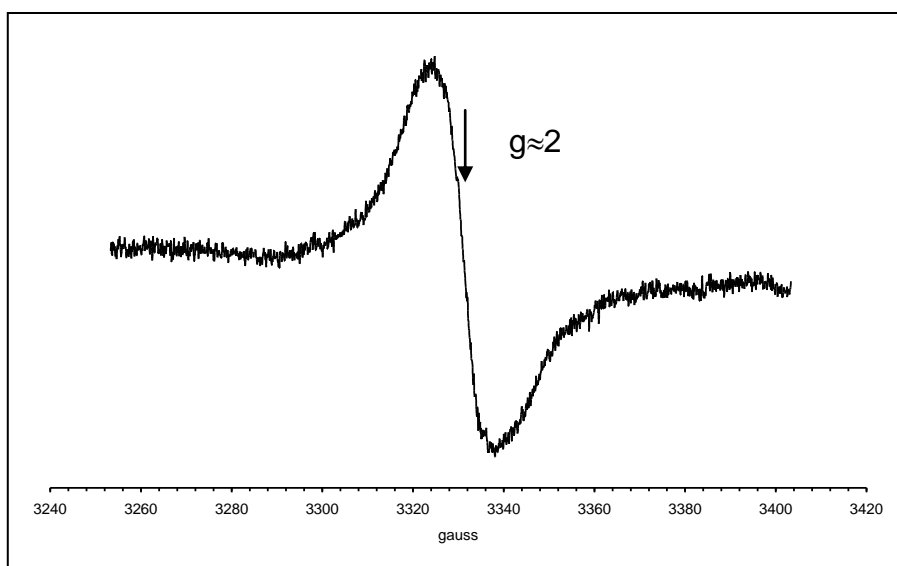

**Figure S4** ESR spectrum of NR-TMSPM-2 composite.
